# Supplementary figures and images for: Impact of dermal matrix thickness on split‐thickness skin graft survival and wound contraction in a single‐stage procedure
Source: PubMed Central journal article supplement — Int Wound J. 2021 Jul 9;19(2):370–9. doi: 10.1111/iwj.13637 (PMC8762550; doi:10.1111/iwj.13637), 2021-07-09

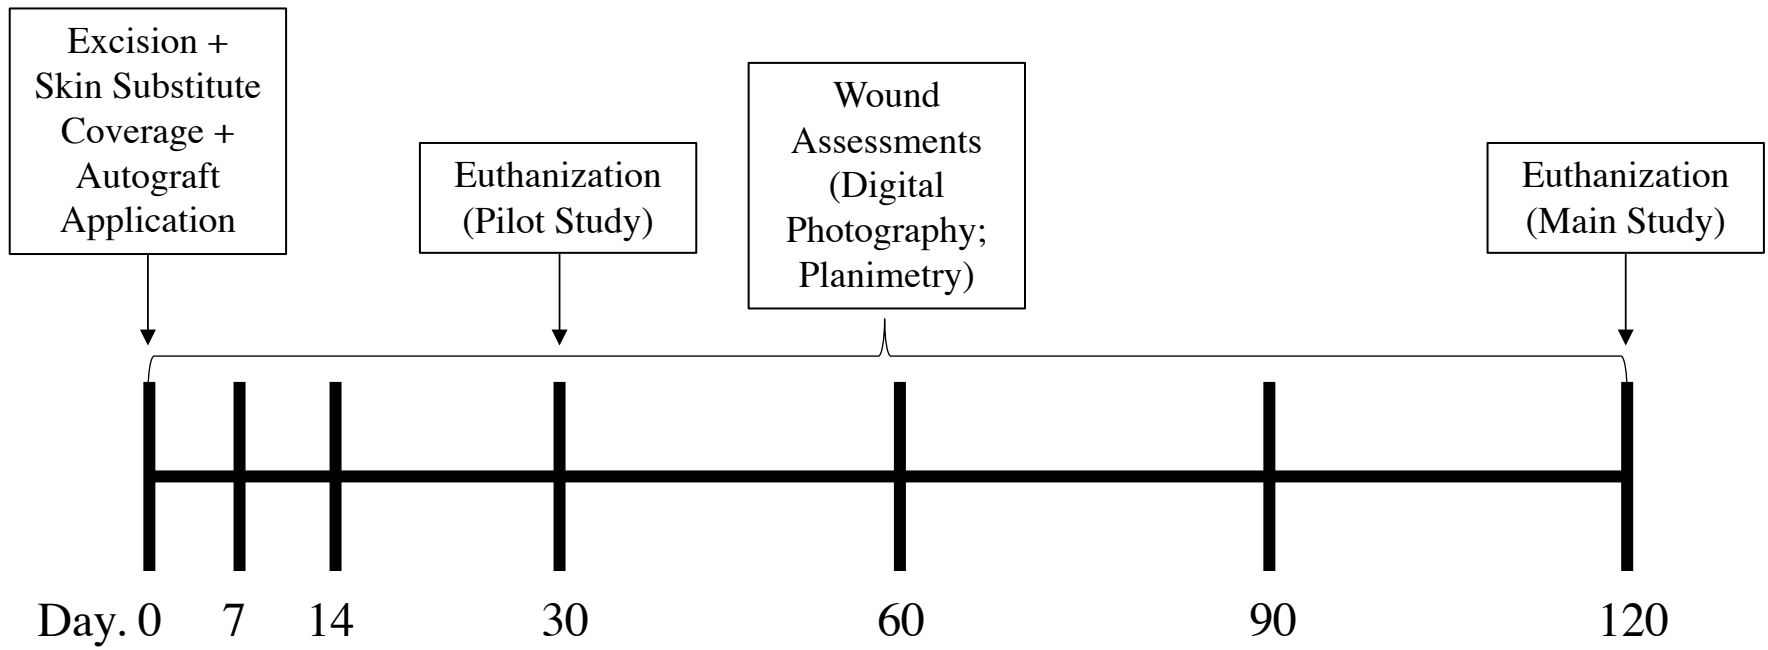

Day. 0    7    14    30    60    90    120

Pilot Study: ADG Thickness

Main Study

Supplement: IWJ-19-370-s001.pdf [file IWJ-19-370-s001.pdf]
